# Supplementary material for: Stevia Genus: Phytochemistry and Biological Activities Update
Source: MDPI journal article supplement (doi:10.3390/molecules26092733), 2021-05-06
Supplement: s1 [file s1]

## Supplementary Materials

### *Stevia* genus: phytochemistry and biological activities update

Jimena Borgo <sup>1,2,3</sup>, Laura C. Laurella <sup>1,2</sup>, Florencia Martini <sup>1,3</sup>, Cesar A. N. Catalán <sup>4</sup>, and Valeria P. Sülsen <sup>1,2,3,\*</sup>

<sup>1</sup> CONICET—Universidad de Buenos Aires, Instituto de Química y Metabolismo del Fármaco (IQUIMEFA), Junín 956 2° piso, 1113 Buenos Aires, Argentina; [jimeborgo@gmail.com](mailto:jimeborgo@gmail.com) (J.B); [lclposdoc@gmail.com](mailto:lclposdoc@gmail.com) (L.C.L); [vsulsen@ffyb.uba.ar](mailto:vsulsen@ffyb.uba.ar) (V.P.S)

<sup>2</sup> Cátedra de Farmacognosia, Facultad de Farmacia y Bioquímica, Universidad de Buenos Aires, Junín 956 2° piso, 1113 Buenos Aires, Argentina

<sup>3</sup> Cátedra de Química Medicinal, Facultad de Farmacia y Bioquímica, Universidad de Buenos Aires, Junín 956 1° piso, 1113 Buenos Aires, Argentina; [flormartini1@gmail.com](mailto:flormartini1@gmail.com) (F.M.)

<sup>4</sup> CONICET—Universidad Nacional de Tucumán, Instituto de Química del Noroeste—CONICET (INQUINOA), Ayacucho 471, San Miguel de Tucumán T4000INI, Argentina; [ccatalan@fbqf.unt.edu.ar](mailto:ccatalan@fbqf.unt.edu.ar) (C.A.N.C)

\*Correspondence: [vsulsen@ffyb.ub.ar](mailto:vsulsen@ffyb.ub.ar) (V.P.S)

Table S1. Compounds isolated from *Stevia* species since 1998

| Species               | Comp. N° | Type of compound | Common name                                                                               | Structure                                                                            | Reported activity | Ref. |
|-----------------------|----------|------------------|-------------------------------------------------------------------------------------------|--------------------------------------------------------------------------------------|-------------------|------|
| <i>Stevia connata</i> | 1        | Longipinene      | Longipinane-7 $\beta$ ,8 $\alpha$ ,9 $\alpha$ -triol-1-one 7-angelate-8-methylbutyrate    | 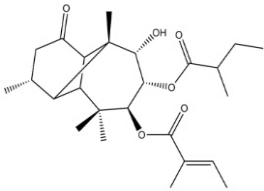   | --                | [18] |
|                       | 2        | Longipinane      | Longipinane-7 $\beta$ ,8 $\alpha$ ,9 $\alpha$ -triol-1-one 8,9-diangelate                 |    | --                | [18] |
|                       | 3        | Longipinene      | Longipinane-7 $\beta$ ,8 $\alpha$ ,9 $\alpha$ -triol-1-one 7,9-diangelate                 |   | --                | [18] |
|                       | 4        | Longipinene      | Longipinane-7 $\beta$ ,8 $\alpha$ ,9 $\alpha$ -triol-1-one 7,8-diangelate                 |  | --                | [18] |
|                       | 5        | Longipinene      | Longipin-2-ene-7 $\beta$ ,8 $\alpha$ ,9 $\alpha$ -triol-1-one 7,8-diangelate              |  | --                | [18] |
|                       | 6        | Longipinene      | Longipin-2-ene-7 $\beta$ ,8 $\alpha$ ,9 $\alpha$ -triol-1-one 8,9-diangelate              |  | --                | [18] |
|                       | 7        | Longipinene      | Longipin-2-ene-7 $\beta$ ,8 $\alpha$ ,9 $\alpha$ -triol-1-one 8-angelate-9-methylbutyrate |  | --                | [18] |

|                        |    |             |                                                                                                      |                                                                                      |    |      |
|------------------------|----|-------------|------------------------------------------------------------------------------------------------------|--------------------------------------------------------------------------------------|----|------|
| <i>S. subpubescens</i> | 8  | Longipinene | Longipin-2-ene-7 $\beta$ ,8 $\alpha$ ,9 $\alpha$ -triol-1-one 7-angelate-8-methylbutyrate            | 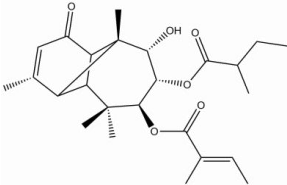   | -- | [18] |
|                        | 9  | sterol      | Stigmasterol                                                                                         |    | -- | [18] |
|                        | 10 | Diterpene   | (4S,5S,6R,8S,9R,10S,13R)-9,13-Epoxy-14-labden-6,19-diol                                              |    | -- | [19] |
|                        | 11 | Diterpene   | (4S,5S,8S,9R,10S,13R)-9,13-Epoxy-14-labden-19-ol                                                     |    | -- | [19] |
|                        | 12 | Diterpene   | (4S,5S,8S,9R,10S,13R)-9,13-Epoxy-14-labden-19-ol-6-one                                               |  | -- | [19] |
|                        | 13 | Diterpene   | (4S,5R,8S,9R,10S,13R)-9,13-Epoxy-14-labden-19-oic acid                                               |  | -- | [19] |
| <i>S. viscida</i>      | 14 | Diterpene   | 3,4 $\beta$ -epoxy-5 $\beta$ ,10 $\beta$ -cis-17 $\alpha$ ,20 $\alpha$ -clerod-13(14)-en-15,16-olide |  | -- | [19] |
|                        | 15 | Triterpene  | 8,14-seco-oleana-8(26),13-dien-3 $\beta$ -ol                                                         |  | -- | [20] |

|                     |    |             |                                                                                                          |                                                                                      |    |      |
|---------------------|----|-------------|----------------------------------------------------------------------------------------------------------|--------------------------------------------------------------------------------------|----|------|
| <i>S. eupatoria</i> | 16 | Triterpene  | 8,14-seco-oleana-8(26),13-dien-3 $\beta$ -acetate                                                        | 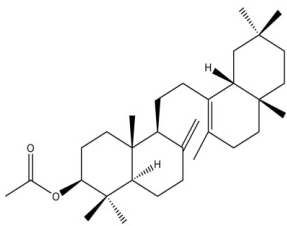   | -- | [20] |
| <i>S. pilosa</i>    | 17 | Longipinene | (4R,5S,7S,8S,9S,10R,11R,20S)-7-angeloyloxy-9-hydroxy-8-( $\alpha$ -methylbutyryloxy)-longipin-2-en-1-one |    | -- | [21] |
|                     | 18 | Longipinene | (4R,5S,7S,8R,10R,11R,20S)-7-angeloyloxy-8-( $\alpha$ -methylbutyryloxy)-longipin-2-en-1-one              |    | -- | [21] |
|                     | 19 | Longipinene | --                                                                                                       |   | -- | [21] |
|                     | 20 | Longipinene | --                                                                                                       |  | -- | [21] |
|                     | 21 | Longipinene | --                                                                                                       |  | -- | [21] |
|                     | 22 | Longipinene | --                                                                                                       |  | -- | [21] |

|                                                   |    |                       |                                                                                                                       |                                                                                      |                              |      |
|---------------------------------------------------|----|-----------------------|-----------------------------------------------------------------------------------------------------------------------|--------------------------------------------------------------------------------------|------------------------------|------|
| <i>S. monardifolia</i>                            | 23 | Longipinene           | 7 $\beta$ ,8 $\alpha$ -diangeloyloxylon gipin-2-en-1-one                                                              | 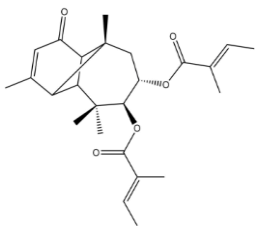   | --                           | [22] |
|                                                   | 24 | Longipinene           | 7 $\beta$ ,8 $\alpha$ -diangeloyloxylon gipinan-1-one                                                                 |    | --                           | [22] |
|                                                   | 25 | Longipinene           | 7 $\beta$ -angeloyloxy-8 $\alpha$ -isovaleroyloxylon gipin-2-en-1-one                                                 |    | --                           | [22] |
| <i>S. tomentosa</i>                               | 26 | Sesquiterpene lactone | 1,5:3,4-diepoxyguaia-10(14)-en-12,8-olide                                                                             |  | --                           | [23] |
| <i>S. phlebophylla</i>                            | 27 | Diterpene glycoside   | 16 $\beta$ -hydroxy-17-acetoxy-ent-kauran-19-oic acid(6-O- $\beta$ -D-xylopyranosyl- $\beta$ -D-glucopyranosyl) ester |  | --                           | [24] |
| <i>S. satureiifolia</i> var. <i>satureiifolia</i> | 28 | Flavonoid             | Eupatorin                                                                                                             |  | Tripanocidal. Leishmanicidal | [25] |
|                                                   | 29 | Flavonoid             | Cirsimaritin                                                                                                          |  | Tripanocidal. Leishmanicidal | [25] |

|                                                 |    |                      |                                                   |                                                                                      |                                   |      |
|-------------------------------------------------|----|----------------------|---------------------------------------------------|--------------------------------------------------------------------------------------|-----------------------------------|------|
|                                                 | 30 | Flavonoid            | 5-desmethylsinense tin                            | 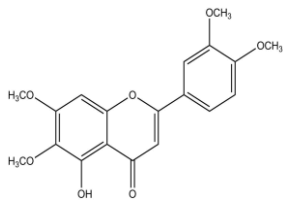   | Tripanocidal.<br>Leishmanicidal   | [25] |
| <i>S. serrata</i>                               | 31 | Sesquiterpene        | Chamazulene                                       |    | Antinociceptive                   | [26] |
|                                                 | 32 | Sesquiterpene        | (E)-nerolidol                                     |    | Antinociceptive                   | [26] |
|                                                 | 33 | Sesquiterpene        | caryophyllene oxide                               |    | Antinociceptive                   | [26] |
|                                                 | 34 | Sesquiterpene        | germacrene D                                      |   | Antinociceptive                   | [26] |
| <i>S. urticifolia</i>                           | 35 | Flavonoid            | Hispidulin                                        |  | Antioxidant.<br>Antiproliferative | [27] |
|                                                 | 36 | Flavonoid            | Nepetin                                           |  | Antioxidant.<br>Antiproliferative | [27] |
|                                                 | 37 | Flavonoid            | Quercetin                                         |  | Antioxidant.<br>Antiproliferative | [27] |
|                                                 | 38 | Flavonoid heteroside | Avicularin or Quercetin-3-O-α-L-arabinofuranoside |  | Antioxidant.<br>Antiproliferative | [27] |
| <i>S. subpubescens</i> var. <i>subpubescens</i> | 39 | Flavonoid            | 4'-O-methylsakuranetin                            |  | Antiinflammatory                  | [28] |

|   |    |                                  |                             |                                                                                      |                  |      |
|---|----|----------------------------------|-----------------------------|--------------------------------------------------------------------------------------|------------------|------|
| s | 40 | Flavonoid                        | Sakuranetin                 | 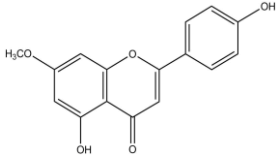   | Antiinflammatory | [28] |
|   | 41 | Flavonoid                        | 3,7,4'-O-trimetilkaempterol |    | Antiinflammatory | [28] |
|   | 42 | Flavonoid                        | Ayanin                      |    | Antiinflammatory | [28] |
|   | 43 | Flavonoid                        | Ermanin                     |    | Antiinflammatory | [28] |
|   | 44 | Flavonoid heteroside             | Hyperin                     |   | Antiinflammatory | [28] |
|   | 45 | Labdane                          | Cistenolic acid             |  | Antiinflammatory | [28] |
|   | 46 | Labdane                          | Labdanolic acid             |  | Antiinflammatory | [28] |
|   | 47 | Coumarin                         | Scoparone                   |  | Antiinflammatory | [28] |
|   | 48 | Glucose ester of o-coumaric acid | Melilotoside                |  | --               | [28] |

|                       |    |                       |                                    |                                                                                      |                                                                                                |                  |
|-----------------------|----|-----------------------|------------------------------------|--------------------------------------------------------------------------------------|------------------------------------------------------------------------------------------------|------------------|
|                       | 49 | glycoside             | L-chiro inositol                   | 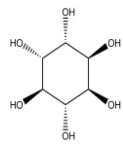   | --                                                                                             | [28]             |
| <i>S. jorullensis</i> | 50 | Sesquiterpene lactone | 11 $\beta$ ,13-dihydrocostunolide  |    | --                                                                                             | [29]             |
|                       | 51 | Sesquiterpene lactone | 11 $\beta$ ,13-dihydroreynosin     |    | --                                                                                             | [29]             |
|                       | 52 | Sesquiterpene lactone | 1 $\beta$ -dihydroxycolartin       |    | --                                                                                             | [29]             |
|                       | 53 | phenolic              | Chlorogenic acid                   |   | --                                                                                             | [29]             |
|                       | 54 | sterol                | $\beta$ -sitosterol                |  | --                                                                                             | [29]             |
|                       | 55 | Steryl glycoside      | $\beta$ -sitosterylglucopyranoside |  | --                                                                                             | [29]             |
|                       | 56 | Steryl glycoside      | Stigmasterylglucopyranoside        |  | --                                                                                             | [29]             |
| <i>S. lucida</i>      | 57 | Sesquiterpene lactone | Alantolactone                      |  | Anti- <i>Trypanosoma cruzi</i> . Anti- <i>T. brucei</i> .<br>Antineoplastic.<br>Antimicrobial. | [30, 86, 87, 90] |



58

Sesquiterpene  
lactone

Isoalantolactone

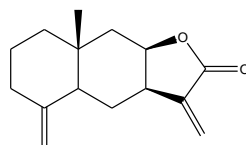

Anti-*Trypanosoma* [30, 86,  
*cruzi*. 87, 90]  
Anti-*T. brucei*.  
Antineoplastic.  
Antimicrobial.

---
